# Supplementary material
Source: PubMed Central journal article supplement (PMC484181)
Supplement: nar_32_12_3689__1.pdf [file nar_32_12_3689__1.pdf]

Predicted operons from *S.aureus* strain Mu50 genome. These operons were predicted using the integrated consensus method as described in the paper with gene pair score 0 as the threshold for operon boundaries.

| Operons                                                                |
|------------------------------------------------------------------------|
| dnaA, dnaN                                                             |
| SAV0003, recF, gyrB, gyrA                                              |
| SAV0007                                                                |
| hutH                                                                   |
| serS                                                                   |
| SAV0010, SAV0011                                                       |
| SAV0012                                                                |
| SAV0013, SAV0014, rplI, dnaC, purA                                     |
| vicR, vicK, SAV0020, SAV0021                                           |
| SAV0022                                                                |
| SAV0023                                                                |
| SAV0024                                                                |
| SAV0025                                                                |
| SAV0026                                                                |
| SAV0030, truncated-repB, truncated-repB, tnp                           |
| pre                                                                    |
| SAV0032, SAV0033                                                       |
| bleO                                                                   |
| aadD                                                                   |
| tnp, tnp                                                               |
| SAV0038                                                                |
| SAV0039, SAV0040                                                       |
| mecA                                                                   |
| mecR1, mecl                                                            |
| xyIR                                                                   |
| SAV0047, SAV0046, SAV0045                                              |
| SAV0048, SAV0049                                                       |
| SAV0050                                                                |
| SAV0051                                                                |
| ermA                                                                   |
| ant(9)                                                                 |
| tnpA, tnpB, tnpC                                                       |
| SAV0060, SAV0059, SAV0058, truncated-radC                              |
| ccrA, ccrB                                                             |
| SAV0064, SAV0063                                                       |
| SAV0065                                                                |
| SAV0068, tnp, tnp                                                      |
| SAV0069                                                                |
| kdpD, kdpE                                                             |
| truncated-kdpA, kdpB(SCCmec), kdpC(SCCmec)                             |
| SAV0076, SAV0075                                                       |
| SAV0077                                                                |
| SAV0080, SAV0079, SAV0078                                              |
| SAV0081                                                                |
| SAV0082                                                                |
| SAV0083                                                                |
| SAV0085, SAV0084                                                       |
| SAV0086, SAV0087, SAV0088                                              |
| SAV0089                                                                |
| SAV0090, SAV0091                                                       |
| SAV0092                                                                |
| SAV0093, SAV0094                                                       |
| plc                                                                    |
| SAV0096, SAV0097, SAV0098, SAV0099, SAV0100, SAV0101, SAV0102, SAV0103 |
| SAV0106, SAV0105, SAV0104                                              |
| SAV0107                                                                |
| SAV0108                                                                |

Predicted operons from *S.aureus* strain Mu50 genome. These operons were predicted using the integrated consensus method as described in the paper with gene pair score 0 as the threshold for operon boundaries.

|                                                                                                |
|------------------------------------------------------------------------------------------------|
| SAV0109                                                                                        |
| lctP                                                                                           |
| spa                                                                                            |
| sarH1                                                                                          |
| sirA, sirB, sirC                                                                               |
| SAV0116, SAV0117, SAV0118, SAV0119, SAV0120, SAV0121, SAV0122, SAV0123, SAV0124                |
| SAV0125                                                                                        |
| butA                                                                                           |
| SAV0127                                                                                        |
| SAV0128, SAV0129                                                                               |
| SAV0130, SAV0131, SAV0132                                                                      |
| sodM                                                                                           |
| SAV0134                                                                                        |
| SAV0135                                                                                        |
| pnp, SAV0137, dra, drm                                                                         |
| SAV0143, SAV0142, SAV0141, SAV0140                                                             |
| SAV0144, SAV0145                                                                               |
| SAV0146, SAV0147                                                                               |
| adhE                                                                                           |
| capA, capB, capC, capD, capE, capF, capG, capH, capI, capJ, capK, capL, capM, capN, capO, capP |
| SAV0166, SAV0165                                                                               |
| aldA                                                                                           |
| SAV0168                                                                                        |
| SAV0170, SAV0169                                                                               |
| SAV0171                                                                                        |
| SAV0172, SAV0173, SAV0174, SAV0175                                                             |
| SAV0176, fdh                                                                                   |
| SAV0178                                                                                        |
| SAV0179, SAV0180                                                                               |
| SAV0181                                                                                        |
| SAV0185, argC, argJ, SAV0182                                                                   |
| SAV0186                                                                                        |
| SAV0187                                                                                        |
| SAV0188                                                                                        |
| glcA                                                                                           |
| SAV0190, SAV0191, SAV0192, SAV0193                                                             |
| SAV0194                                                                                        |
| hsdR                                                                                           |
| SAV0196                                                                                        |
| SAV0197, SAV0198, SAV0199                                                                      |
| SAV0200, SAV0201, SAV0202, SAV0203, SAV0204                                                    |
| oppF                                                                                           |
| truncated-oppB, SAV0207, rlp, SAV0209                                                          |
| SAV0210                                                                                        |
| SAV0211                                                                                        |
| SAV0212                                                                                        |
| msmX, SAV0214, SAV0215, SAV0216, SAV0217, SAV0218, SAV0219                                     |
| SAV0220                                                                                        |
| uhpT, uhpT                                                                                     |
| SAV0225, SAV0224, SAV0223                                                                      |
| pflB, pflA                                                                                     |
| SAV0228                                                                                        |
| SAV0229                                                                                        |
| coa                                                                                            |
| SAV0232, SAV0231                                                                               |
| SAV0233                                                                                        |
| SAV0235, SAV0234                                                                               |
| SAV0236                                                                                        |

Predicted operons from *S.aureus* strain Mu50 genome. These operons were predicted using the integrated consensus method as described in the paper with gene pair score 0 as the threshold for operon boundaries.

|                                                                                                    |
|----------------------------------------------------------------------------------------------------|
| SAV0237                                                                                            |
| SAV0238                                                                                            |
| SAV0240, SAV0239                                                                                   |
| lctE                                                                                               |
| SAV0242                                                                                            |
| SAV0243                                                                                            |
| SAV0244, SAV0245, SAV0246, gatC, SAV0248, SAV0249, SAV0250                                         |
| SAV0251, SAV0252, SAV0253                                                                          |
| SAV0254                                                                                            |
| SAV0255, SAV0256, SAV0257, SAV0258                                                                 |
| scdA                                                                                               |
| lytS, lytR, lrgA, lrgB                                                                             |
| SAV0264                                                                                            |
| SAV0265, bglA                                                                                      |
| SAV0267                                                                                            |
| SAV0270, rbsD, rbsK                                                                                |
| SAV0271                                                                                            |
| SAV0272, SAV0273                                                                                   |
| SAV0274                                                                                            |
| SAV0275                                                                                            |
| lytM                                                                                               |
| SAV0280, SAV0279, SAV0278, SAV0277                                                                 |
| SAV0281                                                                                            |
| SAV0282, SAV0283, SAV0284, SAV0285, SAV0286, SAV0287, SAV0288, SAV0289, SAV0290, SAV0291, SAV0292, |
| SAV0295                                                                                            |
| SAV0296                                                                                            |
| SAV0297                                                                                            |
| SAV0298, SAV0299, SAV0300, SAV0301, SAV0302                                                        |
| SAV0303                                                                                            |
| SAV0304                                                                                            |
| SAV0305                                                                                            |
| SAV0306                                                                                            |
| SAV0307                                                                                            |
| SAV0308, SAV0309                                                                                   |
| SAV0310                                                                                            |
| SAV0311, SAV0312, SAV0313                                                                          |
| nanA, SAV0314                                                                                      |
| SAV0316                                                                                            |
| SAV0317                                                                                            |
| SAV0318                                                                                            |
| SAV0319                                                                                            |
| geh                                                                                                |
| SAV0322, SAV0321                                                                                   |
| SAV0323, SAV0324, SAV0325, SAV0326, SAV0327                                                        |
| SAV0328                                                                                            |
| SAV0332, SAV0331, SAV0330, SAV0329                                                                 |
| SAV0333, SAV0334                                                                                   |
| SAV0335                                                                                            |
| glpT, glpT                                                                                         |
| SAV0338, SAV0339, SAV0340                                                                          |
| SAV0341                                                                                            |
| SAV0342                                                                                            |
| SAV0343, SAV0344, SAV0345                                                                          |
| SAV0347, SAV0346                                                                                   |
| SAV0348                                                                                            |
| SAV0349, SAV0350, SAV0351, SAV0352                                                                 |
| SAV0353                                                                                            |
| SAV0354                                                                                            |

Predicted operons from *S.aureus* strain Mu50 genome. These operons were predicted using the integrated consensus method as described in the paper with gene pair score 0 as the threshold for operon boundaries.

|                                                                                 |
|---------------------------------------------------------------------------------|
| SAV0359, SAV0358, SAV0357, metE, SAV0355                                        |
| SAV0360                                                                         |
| SAV0361, SAV0362, SAV0363                                                       |
| SAV0364                                                                         |
| rpsF, ssb, rpsR                                                                 |
| SAV0369, SAV0368                                                                |
| SAV0370                                                                         |
| SAV0371                                                                         |
| SAV0372                                                                         |
| SAV0373                                                                         |
| SAV0374                                                                         |
| SAV0375                                                                         |
| SAV0376                                                                         |
| SAV0377                                                                         |
| SAV0379, SAV0378                                                                |
| ahpC, ahpF                                                                      |
| SAV0382                                                                         |
| SAV0383                                                                         |
| tnp                                                                             |
| SAV0385                                                                         |
| SAV0386                                                                         |
| SAV0387                                                                         |
| xprT, pbuX, guaB, guaA                                                          |
| SAV0393, int                                                                    |
| SAV0395, SAV0394                                                                |
| SAV0396                                                                         |
| SAV0397                                                                         |
| tetM                                                                            |
| SAV0407, SAV0406, SAV0405, SAV0404, SAV0403, SAV0402, SAV0401, SAV0400, SAV0399 |
| SAV0412, SAV0411, SAV0410, SAV0409, SAV0408                                     |
| SAV0414, SAV0413                                                                |
| tnp                                                                             |
| SAV0416                                                                         |
| SAV0417                                                                         |
| SAV0418                                                                         |
| SAV0419                                                                         |
| SAV0421, SAV0420                                                                |
| set6                                                                            |
| set7                                                                            |
| set8                                                                            |
| set10                                                                           |
| set11                                                                           |
| set12                                                                           |
| set13                                                                           |
| set14, SAV0430, hsdM, hsdS                                                      |
| set15, SAV0434                                                                  |
| SAV0435                                                                         |
| lpl1, lpl2, lpl3                                                                |
| SAV0439, SAV0440, lpl5, lpl6, lpl7, lpl8                                        |
| lpl9, SAV0446, SAV0447, SAV0448                                                 |
| SAV0449                                                                         |
| SAV0450                                                                         |
| SAV0451                                                                         |
| ndhF, SAV0453                                                                   |
| SAV0454                                                                         |
| SAV0455                                                                         |
| SAV0456, SAV0457                                                                |
| SAV0458                                                                         |

Predicted operons from *S.aureus* strain Mu50 genome. These operons were predicted using the integrated consensus method as described in the paper with gene pair score 0 as the threshold for operon boundaries.

|                                                                                              |
|----------------------------------------------------------------------------------------------|
| cysM, yrhB, yrhB                                                                             |
| SAV0462, SAV0463, SAV0464                                                                    |
| SAV0465                                                                                      |
| SAV0466                                                                                      |
| SAV0467, SAV0468                                                                             |
| SAV0470, SAV0469                                                                             |
| gltC                                                                                         |
| gltB, gltD                                                                                   |
| treP, SAV0475, SAV0476                                                                       |
| SAV0477, dnaX, SAV0479, recR                                                                 |
| SAV0481, tmk, SAV0483, holB, SAV0485, SAV0486, SAV0487, SAV0488, SAV0489                     |
| metS, SAV0491, SAV0492, ksgA, veg                                                            |
| SAV0495, purR, SAV0497, spoVG                                                                |
| gcaD, prs, rplY                                                                              |
| pth, mfd, SAV0504, SAV0505, SAV0506, SAV0507, SAV0508, SAV0509, SAV0510, ftsH, SAV0512, cysK |
| folP, folB, folK                                                                             |
| lysS                                                                                         |
| SAV0518                                                                                      |
| SAV0519, SAV0520                                                                             |
| nupC                                                                                         |
| ctsR, SAV0523, SAV0524, clpC                                                                 |
| radA, SAV0527                                                                                |
| gltX                                                                                         |
| cysE, cysS, SAV0531, SAV0532, SAV0533                                                        |
| secE, nusG                                                                                   |
| SAV0536, rplK, rplA, rplJ, rplL, SAV0541, rpoB, rpoC, SAV0544, rpsL, rpsG, fus, tufA         |
| SAV0549                                                                                      |
| SAV0550                                                                                      |
| SAV0551                                                                                      |
| araB                                                                                         |
| SAV0553                                                                                      |
| ilvE                                                                                         |
| SAV0555                                                                                      |
| SAV0557, SAV0556                                                                             |
| SAV0558                                                                                      |
| SAV0559, SAV0560                                                                             |
| sdrC                                                                                         |
| sdrD                                                                                         |
| sdrE                                                                                         |
| SAV0564                                                                                      |
| SAV0565                                                                                      |
| SAV0568, SAV0567, SAV0566                                                                    |
| nagB, SAV0570, SAV0571                                                                       |
| SAV0572                                                                                      |
| proP                                                                                         |
| SAV0574, vraA, vraB, vraC, SAV0578                                                           |
| SAV0579                                                                                      |
| SAV0580                                                                                      |
| ung, SAV0582                                                                                 |
| SAV0583                                                                                      |
| SAV0584                                                                                      |
| SAV0586, SAV0585                                                                             |
| SAV0587                                                                                      |
| pta, SAV0589                                                                                 |
| mvaK1, mvaD, mvaK2                                                                           |
| SAV0593                                                                                      |
| SAV0595, SAV0594                                                                             |
| SAV0596, SAV0597, SAV0598                                                                    |

Predicted operons from *S.aureus* strain Mu50 genome. These operons were predicted using the integrated consensus method as described in the paper with gene pair score 0 as the threshold for operon boundaries.

|                                                                                 |
|---------------------------------------------------------------------------------|
| SAV0599                                                                         |
| SAV0600                                                                         |
| SAV0601                                                                         |
| SAV0602, SAV0603, SAV0604                                                       |
| adh1                                                                            |
| SAV0606, argS                                                                   |
| SAV0608                                                                         |
| SAV0609                                                                         |
| SAV0610, SAV0611, SAV0612                                                       |
| SAV0613                                                                         |
| SAV0614                                                                         |
| SAV0615                                                                         |
| sarA                                                                            |
| SAV0617                                                                         |
| SAV0619, SAV0618                                                                |
| SAV0620, SAV0621, SAV0622, SAV0623, SAV0624, SAV0625, SAV0626, SAV0627, SAV0628 |
| SAV0629                                                                         |
| tnp                                                                             |
| SAV0633, SAV0632, SAV0631                                                       |
| SAV0634                                                                         |
| SAV0635                                                                         |
| tagA                                                                            |
| tagH                                                                            |
| tagG                                                                            |
| tagB, tagX, tagD                                                                |
| pbp4                                                                            |
| SAV0643, SAV0644                                                                |
| SAV0645                                                                         |
| SAV0646                                                                         |
| fhuA, fhuB, fhuG                                                                |
| SAV0650, SAV0651, SAV0652                                                       |
| SAV0653                                                                         |
| SAV0654                                                                         |
| SAV0655                                                                         |
| SAV0656                                                                         |
| SAV0657                                                                         |
| SAV0658, SAV0659, SAV0660, vraF, vraG                                           |
| SAV0663, SAV0664                                                                |
| SAV0665                                                                         |
| SAV0666                                                                         |
| SAV0667, SAV0668                                                                |
| SAV0669                                                                         |
| SAV0670                                                                         |
| SAV0671                                                                         |
| SAV0672                                                                         |
| SAV0673, SAV0674                                                                |
| SAV0675                                                                         |
| SAV0676, SAV0677                                                                |
| SAV0678, SAV0679                                                                |
| SAV0682, SAV0681, SAV0680                                                       |
| bacA                                                                            |
| SAV0684, SAV0685                                                                |
| SAV0686                                                                         |
| SAV0687                                                                         |
| SAV0688, SAV0689                                                                |
| SAV0690, SAV0691                                                                |
| SAV0693, SAV0692                                                                |
| SAV0694                                                                         |

Predicted operons from *S.aureus* strain Mu50 genome. These operons were predicted using the integrated consensus method as described in the paper with gene pair score 0 as the threshold for operon boundaries.

|                                                               |
|---------------------------------------------------------------|
| norA                                                          |
| SAV0696                                                       |
| SAV0697                                                       |
| SAV0698, fruB, fruA                                           |
| nagA                                                          |
| SAV0702                                                       |
| SAV0703                                                       |
| SAV0704                                                       |
| SAV0707, saeR, saeS                                           |
| SAV0708                                                       |
| SAV0712, SAV0711, SAV0710, SAV0709                            |
| SAV0713, SAV0714, SAV0715, SAV0716, SAV0717, SAV0718          |
| SAV0719                                                       |
| SAV0720, recQ                                                 |
| SAV0722, SAV0723                                              |
| SAV0724                                                       |
| SAV0725                                                       |
| SAV0726                                                       |
| SAV0727                                                       |
| SAV0729, SAV0728                                              |
| nrdI, nrdE, nrdF                                              |
| SAV0733, SAV0734, SAV0735, SAV0736                            |
| SAV0738, SAV0737                                              |
| SAV0739                                                       |
| SAV0740                                                       |
| SAV0741                                                       |
| SAV0742                                                       |
| SAV0745, SAV0744, pepT                                        |
| SAV0746                                                       |
| llm                                                           |
| SAV0748                                                       |
| SAV0749                                                       |
| SAV0750, SAV0751, SAV0752                                     |
| secA                                                          |
| prfB                                                          |
| SAV0755                                                       |
| SAV0756, SAV0757, uvrB, uvrA                                  |
| hprK, lgt, SAV0762, SAV0763, trxB                             |
| SAV0765, SAV0766, SAV0767                                     |
| clpP                                                          |
| SAV0769                                                       |
| SAV0770                                                       |
| gapR, gap, pgk, tpi, pgm, eno                                 |
| SAV0777, secG, SAV0779, SAV0780, SAV0781, ssrP                |
| SAV0784, SAV0783                                              |
| SAV0785, SAV0786, SAV0787, SAV0788, SAV0789, SAV0790, SAV0791 |
| SAV0792, SAV0793, SAV0794                                     |
| SAV0795, SAV0796, SAV0797, SAV0798, SAV0799, SAV0800          |
| SAV0801                                                       |
| SAV0802                                                       |
| SAV0803, SAV0804                                              |
| SAV0805, SAV0806                                              |
| SAV0807                                                       |
| SAV0808                                                       |
| SAV0809                                                       |
| SAV0810                                                       |
| fnb                                                           |
| SAV0812                                                       |

Predicted operons from *S.aureus* strain Mu50 genome. These operons were predicted using the integrated consensus method as described in the paper with gene pair score 0 as the threshold for operon boundaries.

|                                                                                                                                                         |
|---------------------------------------------------------------------------------------------------------------------------------------------------------|
| ssp                                                                                                                                                     |
| SAV0814                                                                                                                                                 |
| nuc                                                                                                                                                     |
| cspC                                                                                                                                                    |
| SAV0819, SAV0818, SAV0817                                                                                                                               |
| SAV0821, SAV0820                                                                                                                                        |
| SAV0822                                                                                                                                                 |
| SAV0823                                                                                                                                                 |
| SAV0824                                                                                                                                                 |
| SAV0825                                                                                                                                                 |
| SAV0826                                                                                                                                                 |
| SAV0827                                                                                                                                                 |
| SAV0828                                                                                                                                                 |
| SAV0829, SAV0830                                                                                                                                        |
| SAV0831                                                                                                                                                 |
| SAV0832, SAV0833                                                                                                                                        |
| SAV0834                                                                                                                                                 |
| SAV0835, SAV0836                                                                                                                                        |
| SAV0837, SAV0838, SAV0839                                                                                                                               |
| SAV0840                                                                                                                                                 |
| SAV0841                                                                                                                                                 |
| SAV0842, SAV0843, SAV0844, SAV0845, SAV0846                                                                                                             |
| int                                                                                                                                                     |
| int                                                                                                                                                     |
| SAV0851, SAV0850, SAV0849                                                                                                                               |
| SAV0852, SAV0853                                                                                                                                        |
| SAV0854                                                                                                                                                 |
| SAV0855, SAV0856, SAV0857                                                                                                                               |
| SAV0858                                                                                                                                                 |
| SAV0859                                                                                                                                                 |
| SAV0860                                                                                                                                                 |
| SAV0861                                                                                                                                                 |
| SAV0862, SAV0863                                                                                                                                        |
| SAV0864, SAV0865, SAV0866                                                                                                                               |
| SAV0867                                                                                                                                                 |
| SAV0868, SAV0869, SAV0870, SAV0871, SAV0872                                                                                                             |
| SAV0873, SAV0874, SAV0875, SAV0876, SAV0877, SAV0878, SAV0879, SAV0880, SAV0881, SAV0882, SAV0883, SAV0885, SAV0886, SAV0887, SAV0888, SAV0889          |
| SAV0890, SAV0891                                                                                                                                        |
| SAV0892, SAV0893, SAV0894, SAV0895, SAV0896, SAV0897, SAV0898, SAV0899, SAV0900, SAV0901, SAV0902, SAV0903, SAV0904, SAV0905, SAV0906, SAV0907, SAV0908 |
| SAV0909, SAV0910, SAV0911, SAV0912, SAV0913                                                                                                             |
| SAV0914, SAV0915                                                                                                                                        |
| SAV0916, SAV0917                                                                                                                                        |
| SAV0918                                                                                                                                                 |
| SAV0919, SAV0920                                                                                                                                        |
| SAV0921, SAV0922, SAV0923, lipA                                                                                                                         |
| SAV0925                                                                                                                                                 |
| tnp                                                                                                                                                     |
| SAV0927                                                                                                                                                 |
| SAV0928, SAV0929, SAV0930                                                                                                                               |
| SAV0931, dltA, dltB, dltC, dltD                                                                                                                         |
| SAV0936                                                                                                                                                 |
| SAV0937                                                                                                                                                 |
| SAV0938                                                                                                                                                 |
| SAV0939, SAV0940                                                                                                                                        |
| SAV0941                                                                                                                                                 |
| ampA                                                                                                                                                    |



Predicted operons from *S.aureus* strain Mu50 genome. These operons were predicted using the integrated consensus method as described in the paper with gene pair score 0 as the threshold for operon boundaries.

|                                                            |
|------------------------------------------------------------|
| SAV0943, SAV0944                                           |
| SAV0945                                                    |
| mnhA, mnhB, mnhC, mnhD, mnhE, mnhF, mnhG                   |
| SAV0953                                                    |
| SAV0954                                                    |
| SAV0955                                                    |
| SAV0956                                                    |
| rocD                                                       |
| gudB                                                       |
| glpQ                                                       |
| argG, argH                                                 |
| pgi                                                        |
| SAV0963, spsA, spsB, SAV0966, SAV0967, SAV0968             |
| SAV0969                                                    |
| SAV0971, cdr                                               |
| SAV0972                                                    |
| SAV0973                                                    |
| SAV0974                                                    |
| clpB                                                       |
| SAV0976                                                    |
| SAV0977, SAV0978, SAV0979, SAV0980                         |
| SAV0981                                                    |
| SAV0982                                                    |
| fabH, SAV0984                                              |
| SAV0985                                                    |
| oppB, SAV0987, oppD, oppF, SAV0990                         |
| SAV0991, SAV0992, appF, oppB, SAV0995                      |
| trpS                                                       |
| SAV0997                                                    |
| SAV0998, SAV0999, SAV1000                                  |
| SAV1003, SAV1002, yjbM                                     |
| SAV1004                                                    |
| SAV1005, SAV1006, SAV1007, SAV1008, SAV1009, SAV1010, fabI |
| SAV1012                                                    |
| SAV1013                                                    |
| SAV1014, SAV1015                                           |
| SAV1017, SAV1016                                           |
| murE, SAV1019, SAV1020                                     |
| SAV1021                                                    |
| SAV1022                                                    |
| htrA, SAV1024                                              |
| SAV1025                                                    |
| SAV1026                                                    |
| SAV1027                                                    |
| SAV1028                                                    |
| SAV1029, SAV1030                                           |
| SAV1031                                                    |
| SAV1032, SAV1033, SAV1034, SAV1035                         |
| SAV1036                                                    |
| SAV1037                                                    |
| SAV1038                                                    |
| SAV1039                                                    |
| SAV1040                                                    |
| SAV1041                                                    |
| SAV1042, menD, SAV1044, menB                               |
| sspA, sspB, sspC                                           |
| SAV1049                                                    |
| SAV1050                                                    |

Predicted operons from *S.aureus* strain Mu50 genome. These operons were predicted using the integrated consensus method as described in the paper with gene pair score 0 as the threshold for operon boundaries.

|                                                                        |
|------------------------------------------------------------------------|
| SAV1051                                                                |
| truncated-atl                                                          |
| atl                                                                    |
| SAV1054                                                                |
| SAV1056, SAV1055                                                       |
| fmt                                                                    |
| SAV1061, qoxB, qoxC, SAV1058                                           |
| SAV1062                                                                |
| folD                                                                   |
| SAV1064, purK, purC, SAV1067, purQ, purL, purF, purM, purN, purH, purD |
| SAV1077, SAV1076, SAV1075                                              |
| SAV1079, SAV1078                                                       |
| SAV1080                                                                |
| SAV1081, SAV1082                                                       |
| ptsH, ptsI                                                             |
| SAV1085                                                                |
| SAV1086, SAV1087                                                       |
| SAV1088                                                                |
| SAV1090, SAV1089                                                       |
| pdf1                                                                   |
| SAV1092                                                                |
| pdhA, phdB, pdhC, pdhD                                                 |
| SAV1097                                                                |
| SAV1098, potA, potB, potC, potD, SAV1103                               |
| SAV1104                                                                |
| SAV1105                                                                |
| SAV1106                                                                |
| SAV1107                                                                |
| SAV1108                                                                |
| SAV1109                                                                |
| SAV1111, SAV1110                                                       |
| SAV1112                                                                |
| SAV1113                                                                |
| pycA                                                                   |
| SAV1115                                                                |
| ctaB, SAV1117                                                          |
| SAV1118, SAV1119, SAV1120                                              |
| SAV1121                                                                |
| SAV1122                                                                |
| SAV1123                                                                |
| SAV1124, SAV1125                                                       |
| SAV1126                                                                |
| SAV1127, rpmF                                                          |
| SAV1129                                                                |
| SAV1130                                                                |
| SAV1131, SAV1132, SAV1133, SAV1134, SAV1135, SAV1136                   |
| SAV1137                                                                |
| pheS, pheT                                                             |
| SAV1140                                                                |
| SAV1141, SAV1142, SAV1143, mutS2, trxA                                 |
| uvrC                                                                   |
| sdhC, sdhA, sdhB, sdhB                                                 |
| murI, SAV1152, SAV1153                                                 |
| SAV1154                                                                |
| SAV1155                                                                |
| SAV1156                                                                |
| SAV1157                                                                |
| SAV1158                                                                |

Predicted operons from *S.aureus* strain Mu50 genome. These operons were predicted using the integrated consensus method as described in the paper with gene pair score 0 as the threshold for operon boundaries.

|                                                                              |
|------------------------------------------------------------------------------|
| SAV1159                                                                      |
| SAV1160                                                                      |
| SAV1161                                                                      |
| tnp                                                                          |
| SAV1163                                                                      |
| SAV1164                                                                      |
| SAV1165                                                                      |
| SAV1166                                                                      |
| SAV1168, SAV1167                                                             |
| argF, SAV1170, SAV1171                                                       |
| SAV1172                                                                      |
| SAV1173                                                                      |
| SAV1174                                                                      |
| SAV1175                                                                      |
| SAV1176                                                                      |
| SAV1177, SAV1178, SAV1179, ftsL, pbpA, mraY, murD, div1b, ftsA, ftsZ         |
| SAV1187, SAV1188, SAV1189, SAV1190, SAV1191, SAV1192, ileS                   |
| SAV1194                                                                      |
| truncated-tnp                                                                |
| lsp, SAV1197                                                                 |
| pyrR, pyrP, pyrB, pyrC, pyrAA, pyrAB                                         |
| pyrF, pyrE, SAV1206                                                          |
| SAV1207                                                                      |
| SAV1208                                                                      |
| gmk, SAV1210, SAV1211, priA                                                  |
| SAV1213                                                                      |
| SAV1214                                                                      |
| SAV1215, SAV1216, SAV1217, SAV1218, SAV1219, SAV1220, SAV1221, cfxE, SAV1223 |
| rpmB                                                                         |
| SAV1225, SAV1226, recG, SAV1228, plsX, fabD, fabG                            |
| hmrB, rnc, smc, SAV1235, SAV1236, ffh                                        |
| rpsP, rimM, trmD, rplS                                                       |
| SAV1242                                                                      |
| SAV1243, rnhB                                                                |
| sucC, sucD                                                                   |
| lytN, fmhC(eprh)                                                             |
| SAV1249, SAV1250, gid                                                        |
| xerC, clpQ, clpY, codY                                                       |
| rpsB, SAV1257, smbA, frr                                                     |
| uppS, cdsA, SAV1262, proS, polC, SAV1265, nusA, SAV1267, SAV1268, infB       |
| rbfA, truB, ribC, rpsO                                                       |
| pnpA                                                                         |
| SAV1275                                                                      |
| spolIIE, SAV1277, SAV1278, SAV1279, SAV1280                                  |
| SAV1281, SAV1282, pgsA, cinA, recA                                           |
| SAV1286                                                                      |
| SAV1287                                                                      |
| SAV1288                                                                      |
| SAV1289, SAV1290, SAV1291                                                    |
| SAV1292, SAV1293, SAV1294                                                    |
| mutS, mutS, mutL, glpP                                                       |
| SAV1299                                                                      |
| glpF, glpK, glpD                                                             |
| SAV1303, miaA, SAV1305                                                       |
| bsaA                                                                         |
| SAV1307, SAV1308, glnR, glnA                                                 |
| SAV1311                                                                      |
| SAV1312                                                                      |

Predicted operons from *S.aureus* strain Mu50 genome. These operons were predicted using the integrated consensus method as described in the paper with gene pair score 0 as the threshold for operon boundaries.

|                                             |
|---------------------------------------------|
| SAV1313                                     |
| SAV1314                                     |
| SAV1315                                     |
| SAV1316, SAV1317                            |
| SAV1318, SAV1319, SAV1320, SAV1321, SAV1322 |
| SAV1323                                     |
| nuc                                         |
| SAV1325                                     |
| SAV1326                                     |
| SAV1327                                     |
| dhoM, thrC, thrB, SAV1331                   |
| SAV1332                                     |
| SAV1333                                     |
| katA, rpmG                                  |
| rpsN                                        |
| SAV1337, SAV1338                            |
| lexA                                        |
| SAV1340                                     |
| SAV1341, tkt, SAV1343                       |
| SAV1344                                     |
| SAV1345, SAV1346                            |
| mscL                                        |
| opuD, opuD                                  |
| citB                                        |
| SAV1351                                     |
| SAV1352                                     |
| SAV1353                                     |
| parE, parC                                  |
| alsT                                        |
| glcT, SAV1358, SAV1359                      |
| fmtC                                        |
| msrA                                        |
| msrR                                        |
| SAV1363                                     |
| SAV1364                                     |
| tyrA                                        |
| SAV1366                                     |
| SAV1367, trpG, trpD, trpC, trpF, trpB, trpA |
| femA, femB                                  |
| SAV1376                                     |
| SAV1377                                     |
| SAV1378                                     |
| SAV1382, SAV1381, SAV1380, SAV1379          |
| SAV1383                                     |
| SAV1384                                     |
| SAV1389, SAV1388, SAV1387, pstB, SAV1385    |
| SAV1390                                     |
| SAV1391                                     |
| SAV1392                                     |
| lysC, asd, dapA, dapB, dapD                 |
| SAV1398, SAV1399, lysA                      |
| SAV1401                                     |
| cspA                                        |
| SAV1403                                     |
| SAV1404, SAV1405, SAV1406                   |
| braB                                        |
| SAV1409, SAV1408                            |
| SAV1411, SAV1410                            |

Predicted operons from *S.aureus* strain Mu50 genome. These operons were predicted using the integrated consensus method as described in the paper with gene pair score 0 as the threshold for operon boundaries.

|                                                         |
|---------------------------------------------------------|
| odhA, odhB                                              |
| truncated-arlR, arlS                                    |
| SAV1416                                                 |
| SAV1419, murG, SAV1417                                  |
| ctpA                                                    |
| thyA, dfrA, SAV1425, SAV1424, SAV1423, SAV1422, SAV1421 |
| SAV1431, SAV1430, SAV1429, SAV1428                      |
| SAV1432                                                 |
| SAV1433                                                 |
| ebhB, ebhA                                              |
| SAV1436                                                 |
| SAV1439, SAV1438, SAV1437                               |
| SAV1441, SAV1440                                        |
| SAV1442                                                 |
| SAV1444, SAV1443                                        |
| SAV1445                                                 |
| SAV1448, SAV1447, SAV1446                               |
| recU, pbp2                                              |
| SAV1453, nth, SAV1451                                   |
| asnS                                                    |
| SAV1458, SAV1457, SAV1456, dinG                         |
| SAV1459                                                 |
| aroC, aroB, aroA, SAV1463, SAV1462, SAV1461, SAV1460    |
| SAV1472, gerCB, gerCC, ndk, SAV1468, SAV1467            |
| hu                                                      |
| SAV1476, SAV1475, gpsA                                  |
| SAV1477                                                 |
| cmk                                                     |
| ansA                                                    |
| SAV1480                                                 |
| ebpS                                                    |
| SAV1483, SAV1482                                        |
| fer                                                     |
| SAV1485                                                 |
| SAV1486                                                 |
| SAV1490, SAV1489, SAV1488, SAV1487                      |
| SAV1495, SAV1494, rluB, srrA, srrB                      |
| SAV1496                                                 |
| SAV1498, xerD                                           |
| SAV1499                                                 |
| SAV1500                                                 |
| SAV1502, SAV1501                                        |
| SAV1503                                                 |
| SAV1504                                                 |
| SAV1505                                                 |
| SAV1506                                                 |
| malR, malA                                              |
| SAV1509                                                 |
| SAV1510                                                 |
| SAV1512, gnd                                            |
| SAV1514, SAV1513                                        |
| SAV1518, bfmBAA, bfmBAB, bmfBB                          |
| ahrC, recN                                              |
| accB, accC, SAV1525, SAV1524, SAV1523, SAV1522, ispA    |
| SAV1528                                                 |
| SAV1530, SAV1529                                        |
| SAV1531, SAV1532                                        |
| SAV1533                                                 |

Predicted operons from *S.aureus* strain Mu50 genome. These operons were predicted using the integrated consensus method as described in the paper with gene pair score 0 as the threshold for operon boundaries.

|                                                                                                         |
|---------------------------------------------------------------------------------------------------------|
| SAV1534                                                                                                 |
| SAV1537, SAV1536, SAV1535                                                                               |
| SAV1538                                                                                                 |
| SAV1550, SAV1549, SAV1548, glcK, SAV1546, SAV1545, SAV1544, SAV1543, SAV1542, SAV1541, SAV1540, SAV1539 |
| rpmG                                                                                                    |
| sodA, pbp3                                                                                              |
| SAV1556, SAV1555, SAV1554                                                                               |
| SAV1564, SAV1563, dnaG, sigA, SAV1560, SAV1559, SAV1558, SAV1557                                        |
| glyS                                                                                                    |
| phoH, SAV1570, SAV1569, cdd, bex, SAV1566                                                               |
| SAV1574, SAV1573, SAV1572                                                                               |
| rpsU                                                                                                    |
| hemN, hrcA, grpE, dnaK, dnaJ, SAV1578, SAV1577, SAV1576                                                 |
| SAV1584                                                                                                 |
| lepA                                                                                                    |
| rpsT                                                                                                    |
| pfs, SAV1598, SAV1597, aroE, SAV1595, SAV1594, SAV1593, SAV1592, SAV1591, SAV1590, comEB, SAV1588,      |
| SAV1600                                                                                                 |
| SAV1601                                                                                                 |
| SAV1602                                                                                                 |
| SAV1603                                                                                                 |
| SAV1609, SAV1608, SAV1607, SAV1606, SAV1605, SAV1604                                                    |
| SAV1614, SAV1613, SAV1612, udk, greA                                                                    |
| alaS, SAV1617, SAV1616, SAV1615                                                                         |
| SAV1620, SAV1619                                                                                        |
| SAV1622, SAV1621                                                                                        |
| SAV1623                                                                                                 |
| SAV1626, csbD, SAV1624                                                                                  |
| SAV1627                                                                                                 |
| SAV1628                                                                                                 |
| SAV1629                                                                                                 |
| hisS, aspS                                                                                              |
| relA, SAV1633, lytH                                                                                     |
| obg, SAV1643, ruvA, ruvB, queA, tgt, SAV1638, secF, SAV1636, apt                                        |
| rplU, SAV1646, rpmA                                                                                     |
| SAV1649, SAV1648                                                                                        |
| SAV1650                                                                                                 |
| SAV1651                                                                                                 |
| SAV1652                                                                                                 |
| SAV1653                                                                                                 |
| SAV1654                                                                                                 |
| ermA                                                                                                    |
| ant(9)                                                                                                  |
| tnpA, tnpB, tnpC                                                                                        |
| valS, folC, SAV1661, truncated-radC                                                                     |
| tag                                                                                                     |
| SAV1677, SAV1676, tig, clpX, SAV1673, hemA, hemX, hemC, hemD, hemB, hemL, SAV1666, SAV1665              |
| infC, rpmI, rplT                                                                                        |
| SAV1681                                                                                                 |
| SAV1682                                                                                                 |
| thrS                                                                                                    |
| SAV1686, dnaB, dnaI                                                                                     |
| polA, SAV1689, SAV1688, gapB                                                                            |
| SAV1691                                                                                                 |
| phoP, phoR                                                                                              |
| citZ, citC                                                                                              |
| aapA                                                                                                    |
| pfk, pykA                                                                                               |

Predicted operons from *S.aureus* strain Mu50 genome. These operons were predicted using the integrated consensus method as described in the paper with gene pair score 0 as the threshold for operon boundaries.

|                                                                     |
|---------------------------------------------------------------------|
| tnp                                                                 |
| SAV1701, accA                                                       |
| SAV1702                                                             |
| SAV1704, dnaE                                                       |
| SAV1705                                                             |
| SAV1706                                                             |
| SAV1707                                                             |
| SAV1708                                                             |
| ald                                                                 |
| SAV1710                                                             |
| SAV1716, SAV1715, SAV1714, SAV1713, SAV1712, ackA                   |
| SAV1717                                                             |
| SAV1718, rpsD                                                       |
| tnp                                                                 |
| SAV1721                                                             |
| SAV1722                                                             |
| SAV1723, serA                                                       |
| SAV1725                                                             |
| ptaA                                                                |
| SAV1727                                                             |
| SAV1728                                                             |
| tyrS                                                                |
| sgtA                                                                |
| SAV1731                                                             |
| fhs                                                                 |
| acsA                                                                |
| acuA, acuC                                                          |
| ccpA                                                                |
| SAV1737                                                             |
| SAV1745, SAV1744, SAV1743, SAV1742, SAV1741, murC, SAV1739, SAV1738 |
| SAV1746                                                             |
| SAV1747                                                             |
| SAV1749, SAV1748                                                    |
| SAV1751, SAV1750                                                    |
| SAV1754, SAV1753, SAV1752                                           |
| SAV1755, SAV1756                                                    |
| mrp, mrp                                                            |
| leuS, SAV1759                                                       |
| SAV1761                                                             |
| SAV1762, SAV1763                                                    |
| rot                                                                 |
| SAV1765                                                             |
| SAV1766                                                             |
| ribD, ribB, ribA, SAV1768, SAV1767                                  |
| SAV1772                                                             |
| SAV1773, SAV1774                                                    |
| SAV1775                                                             |
| SAV1776                                                             |
| SAV1777                                                             |
| SAV1778                                                             |
| SAV1779                                                             |
| SAV1780                                                             |
| SAV1781                                                             |
| SAV1782                                                             |
| SAV1783, SAV1784                                                    |
| SAV1785                                                             |
| SAV1786, SAV1787                                                    |
| SAV1788                                                             |

Predicted operons from *S.aureus* strain Mu50 genome. These operons were predicted using the integrated consensus method as described in the paper with gene pair score 0 as the threshold for operon boundaries.

|                                    |
|------------------------------------|
| SAV1789                            |
| metK                               |
| pckA                               |
| SAV1792                            |
| SAV1794, SAV1793                   |
| SAV1795                            |
| menE, menC                         |
| SAV1798                            |
| SAV1799, SAV1800, SAV1801, SAV1802 |
| SAV1803                            |
| SAV1805, SAV1804                   |
| tnp                                |
| SAV1808, SAV1807                   |
| spIF                               |
| spID                               |
| spIB, spIC                         |
| spIA                               |
| SAV1814                            |
| SAV1815                            |
| SAV1816                            |
| SAV1817, SAV1818                   |
| lukE, lukD                         |
| SAV1821                            |
| SAV1822                            |
| SAV1823                            |
| seg                                |
| yent1, yent2, sen                  |
| sem, sei                           |
| seo                                |
| SAV1831                            |
| hemE, hemH, hemY                   |
| traP                               |
| SAV1837, SAV1836                   |
| hit                                |
| SAV1839                            |
| SAV1840, prsA                      |
| SAV1844, SAV1843, cbf1             |
| SAV1846, SAV1845                   |
| SAV1847                            |
| SAV1849, SAV1848                   |
| SAV1850                            |
| citG                               |
| SAV1852                            |
| SAV1854, SAV1853                   |
| SAV1856, SAV1855                   |
| SAV1858, SAV1857                   |
| SAV1859                            |
| tnp                                |
| SAV1863, SAV1862, SAV1861          |
| gsaB, SAV1865                      |
| SAV1867, SAV1866                   |
| SAV1868                            |
| SAV1869                            |
| SAV1873, SAV1872, SAV1871, SAV1870 |
| SAV1874                            |
| SAV1875                            |
| SAV1876                            |
| SAV1877                            |



Predicted operons from *S.aureus* strain Mu50 genome. These operons were predicted using the integrated consensus method as described in the paper with gene pair score 0 as the threshold for operon boundaries.

|                                                                                                                                                |
|------------------------------------------------------------------------------------------------------------------------------------------------|
| SAV1880, ampS, SAV1878                                                                                                                         |
| SAV1881, SAV1882, SAV1883                                                                                                                      |
| SAV1887, SAV1886, vraS, vraR                                                                                                                   |
| map                                                                                                                                            |
| SAV1889                                                                                                                                        |
| SAV1890                                                                                                                                        |
| SAV1892, SAV1891                                                                                                                               |
| SAV1893                                                                                                                                        |
| SAV1894                                                                                                                                        |
| SAV1895                                                                                                                                        |
| SAV1896                                                                                                                                        |
| SAV1898, SAV1897                                                                                                                               |
| SAV1901, SAV1900, SAV1899                                                                                                                      |
| putP                                                                                                                                           |
| pcrB, pcrA, dnlJ, SAV1903                                                                                                                      |
| SAV1907                                                                                                                                        |
| purB                                                                                                                                           |
| SAV1909, SAV1910                                                                                                                               |
| SAV1911                                                                                                                                        |
| SAV1913, nadE                                                                                                                                  |
| SAV1914, SAV1915                                                                                                                               |
| SAV1916                                                                                                                                        |
| SAV1917                                                                                                                                        |
| SAV1918, SAV1919                                                                                                                               |
| aldH                                                                                                                                           |
| SAV1921                                                                                                                                        |
| SAV1922                                                                                                                                        |
| SAV1923                                                                                                                                        |
| SAV1924                                                                                                                                        |
| SAV1925                                                                                                                                        |
| SAV1928, SAV1927, SAV1926                                                                                                                      |
| SAV1929                                                                                                                                        |
| SAV1934, SAV1933, SAV1932, SAV1931, SAV1930                                                                                                    |
| SAV1935                                                                                                                                        |
| SAV1936                                                                                                                                        |
| truncated-mapW, truncated-mapW                                                                                                                 |
| truncated-hlb                                                                                                                                  |
| SAV1940                                                                                                                                        |
| SAV1941                                                                                                                                        |
| SAV1942                                                                                                                                        |
| truncated-lytA                                                                                                                                 |
| sak                                                                                                                                            |
| SAV1946, SAV1945                                                                                                                               |
| SAV1947                                                                                                                                        |
| sep                                                                                                                                            |
| SAV1949                                                                                                                                        |
| SAV1955, SAV1954, SAV1953, SAV1952, SAV1951, SAV1950                                                                                           |
| SAV1956                                                                                                                                        |
| SAV1967, SAV1966, SAV1965, SAV1964, SAV1963, SAV1962, SAV1961, SAV1960, SAV1959, SAV1958, SAV1957                                              |
| SAV1968                                                                                                                                        |
| SAV1984, SAV1983, SAV1982, SAV1981, SAV1980, SAV1979, SAV1978, SAV1977, SAV1976, SAV1975, SAV1974, SAV1973, SAV1972, SAV1971, SAV1970, SAV1969 |
| SAV1991, SAV1990, SAV1989, SAV1988, SAV1987, SAV1986, SAV1985                                                                                  |
| SAV1992                                                                                                                                        |
| SAV1994, SAV1993                                                                                                                               |
| SAV1995                                                                                                                                        |
| SAV1997, SAV1996                                                                                                                               |
| SAV1998, SAV1999, SAV2000, SAV2001, int, truncated-hlb                                                                                         |

Predicted operons from *S.aureus* strain Mu50 genome. These operons were predicted using the integrated consensus method as described in the paper with gene pair score 0 as the threshold for operon boundaries.

|                                                         |
|---------------------------------------------------------|
| SAV2005, SAV2004                                        |
| SAV2006                                                 |
| SAV2007                                                 |
| sel                                                     |
| sec3                                                    |
| SAV2010                                                 |
| tst                                                     |
| SAV2012                                                 |
| SAV2013, SAV2014                                        |
| SAV2018, SAV2017, SAV2016, SAV2015                      |
| SAV2020, SAV2019                                        |
| SAV2026, SAV2025, SAV2024, SAV2023, SAV2022, SAV2021    |
| SAV2027, int                                            |
| groES, groEL                                            |
| SAV2031                                                 |
| SAV2032                                                 |
| SAV2033                                                 |
| SAV2034                                                 |
| hld                                                     |
| agrB, agrD, agrC, agrA                                  |
| scrR, scrB, SAV2040                                     |
| nrgA                                                    |
| SAV2045, SAV2044                                        |
| SAV2046                                                 |
| vga                                                     |
| SAV2048                                                 |
| SAV2052, SAV2051, SAV2050, SAV2049                      |
| ilvD, ilvB, SAV2055, ilvC, leuA, leuB, leuC, leuD, ilvA |
| SAV2063, SAV2062                                        |
| rsbU, rsbV, rsbW, sigB                                  |
| SAV2074, SAV2073, SAV2072, dpj, alr, SAV2069, SAV2068   |
| kdpA, kdpB, kdpC                                        |
| kdpD, kdpE                                              |
| tnp                                                     |
| SAV2081                                                 |
| ddlA, murF                                              |
| SAV2084                                                 |
| SAV2085                                                 |
| SAV2087, SAV2086                                        |
| SAV2088, SAV2089                                        |
| SAV2094, thiD, thiM, thiE, SAV2090                      |
| SAV2095                                                 |
| SAV2096                                                 |
| SAV2097                                                 |
| SAV2101, murA, murA, SAV2098                            |
| SAV2110, atpB, atpE, atpF, atpH, atpA, atpG, atpD, atpC |
| SAV2114, glyA, upp, mnaA                                |
| tdk, prfA, SAV2117, SAV2116, SAV2115                    |
| rho, rpmE                                               |
| SAV2122                                                 |
| murZ, SAV2123                                           |
| fbaA                                                    |
| SAV2126                                                 |
| pyrG                                                    |
| rpoE                                                    |
| SAV2129                                                 |
| SAV2130                                                 |
| SAV2131                                                 |

Predicted operons from *S.aureus* strain Mu50 genome. These operons were predicted using the integrated consensus method as described in the paper with gene pair score 0 as the threshold for operon boundaries.

|                                                                                                                                                                             |
|-----------------------------------------------------------------------------------------------------------------------------------------------------------------------------|
| hmrA, SAV2132                                                                                                                                                               |
| luxS                                                                                                                                                                        |
| SAV2137, pdp, SAV2135                                                                                                                                                       |
| deoD                                                                                                                                                                        |
| dps                                                                                                                                                                         |
| SAV2140                                                                                                                                                                     |
| SAV2141                                                                                                                                                                     |
| SAV2143, SAV2142                                                                                                                                                            |
| SAV2144                                                                                                                                                                     |
| czrA, czrB                                                                                                                                                                  |
| SAV2147                                                                                                                                                                     |
| SAV2148                                                                                                                                                                     |
| SAV2149                                                                                                                                                                     |
| SAV2150, SAV2151                                                                                                                                                            |
| SAV2153, SAV2152                                                                                                                                                            |
| glmS                                                                                                                                                                        |
| SAV2155, mtIF, SAV2157, mtIA, mtID                                                                                                                                          |
| fmtB(mrp)                                                                                                                                                                   |
| SAV2163, SAV2162, glmM(femD)                                                                                                                                                |
| arg                                                                                                                                                                         |
| SAV2165                                                                                                                                                                     |
| SAV2166                                                                                                                                                                     |
| SAV2169, SAV2168, SAV2167                                                                                                                                                   |
| SAV2172, SAV2171, SAV2170                                                                                                                                                   |
| SAV2173                                                                                                                                                                     |
| SAV2174                                                                                                                                                                     |
| SAV2177, SAV2176, SAV2175                                                                                                                                                   |
| SAV2180, SAV2179, SAV2178                                                                                                                                                   |
| SAV2181                                                                                                                                                                     |
| SAV2184, SAV2183, asp23                                                                                                                                                     |
| SAV2185                                                                                                                                                                     |
| SAV2186                                                                                                                                                                     |
| SAV2187                                                                                                                                                                     |
| SAV2188                                                                                                                                                                     |
| lacA, lacB, lacC, lacD, lacF, lacE, lacG                                                                                                                                    |
| lacR                                                                                                                                                                        |
| SAV2197, SAV2198                                                                                                                                                            |
| SAV2199                                                                                                                                                                     |
| SAV2201, SAV2200                                                                                                                                                            |
| hysA                                                                                                                                                                        |
| SAV2203                                                                                                                                                                     |
| SAV2204                                                                                                                                                                     |
| SAV2205                                                                                                                                                                     |
| alsS, SAV2206                                                                                                                                                               |
| SAV2208                                                                                                                                                                     |
| SAV2209                                                                                                                                                                     |
| SAV2211, SAV2210                                                                                                                                                            |
| SAV2212                                                                                                                                                                     |
| SAV2215, SAV2214, SAV2213                                                                                                                                                   |
| SAV2216                                                                                                                                                                     |
| SAV2222, SAV2221, SAV2220, truA, rplM, rpsI                                                                                                                                 |
| rpsJ, rplC, rplD, rplW, rplB, rpsS, rplV, rpsC, rplP, rpmC, rpsQ, rplN, rplX, rplE, rpsN, rpsH, rplF, rplR, rpsE, rpmD, rplO, secY, adk, infA, rpmJ, rpsM, rpsK, rpoA, rplQ |
| SAV2252                                                                                                                                                                     |
| SAV2253                                                                                                                                                                     |
| topB                                                                                                                                                                        |
| SAV2255                                                                                                                                                                     |
| SAV2256                                                                                                                                                                     |

Predicted operons from *S.aureus* strain Mu50 genome. These operons were predicted using the integrated consensus method as described in the paper with gene pair score 0 as the threshold for operon boundaries.

|                                          |
|------------------------------------------|
| SAV2257                                  |
| SAV2258                                  |
| SAV2259                                  |
| SAV2260                                  |
| SAV2261                                  |
| fmhB                                     |
| SAV2263                                  |
| SAV2264                                  |
| SAV2265, SAV2266                         |
| SAV2267                                  |
| moeA, mobB, moaE, moaD, mobA, moaA       |
| moaC                                     |
| moeB, moaB                               |
| modB, modC                               |
| modA                                     |
| narQ                                     |
| SAV2282, SAV2281                         |
| SAV2283                                  |
| SAV2284                                  |
| SAV2287, SAV2286, SAV2285                |
| ureA, ureB, ureC, ureE, ureF, ureG, ureD |
| sarR                                     |
| SAV2298, SAV2297, SAV2296                |
| ssaA                                     |
| SAV2300                                  |
| SAV2302, SAV2301                         |
| SAV2303                                  |
| SAV2304                                  |
| SAV2305                                  |
| SAV2306                                  |
| SAV2307                                  |
| SAV2309, SAV2308                         |
| SAV2310                                  |
| SAV2311                                  |
| SAV2312                                  |
| SAV2313                                  |
| SAV2314                                  |
| SAV2315                                  |
| SAV2316                                  |
| SAV2317, SAV2318                         |
| SAV2321, SAV2320, SAV2319                |
| SAV2322                                  |
| glvC                                     |
| SAV2324                                  |
| SAV2325                                  |
| SAV2326                                  |
| SAV2327                                  |
| SAV2328                                  |
| SAV2329                                  |
| hutU, hutI                               |
| SAV2332                                  |
| fosB                                     |
| SAV2334                                  |
| SAV2335                                  |
| SAV2336                                  |
| SAV2337                                  |
| SAV2339, SAV2338                         |
| SAV2341, SAV2340                         |

Predicted operons from *S.aureus* strain Mu50 genome. These operons were predicted using the integrated consensus method as described in the paper with gene pair score 0 as the threshold for operon boundaries.

|                                                      |
|------------------------------------------------------|
| SAV2342                                              |
| SAV2343                                              |
| SAV2344                                              |
| SAV2345                                              |
| SAV2347, fni                                         |
| SAV2348, SAV2349                                     |
| SAV2350                                              |
| SAV2351                                              |
| SAV2353, SAV2352                                     |
| SAV2354                                              |
| tcaB                                                 |
| tcaA                                                 |
| tcaR                                                 |
| SAV2358                                              |
| SAV2360, SAV2359                                     |
| SAV2361, SAV2362                                     |
| SAV2363, SAV2364                                     |
| SAV2365                                              |
| SAV2366                                              |
| SAV2367                                              |
| SAV2368                                              |
| SAV2369                                              |
| SAV2370                                              |
| SAV2372, SAV2371                                     |
| SAV2373                                              |
| SAV2374                                              |
| SAV2375, SAV2376                                     |
| scrA                                                 |
| SAV2378                                              |
| tnp                                                  |
| SAV2380                                              |
| SAV2381, SAV2382                                     |
| SAV2383                                              |
| gltT                                                 |
| SAV2385                                              |
| SAV2386                                              |
| SAV2387                                              |
| narK                                                 |
| SAV2389, SAV2390                                     |
| narG, narH, SAV2395, narI, SAV2393, SAV2392, SAV2391 |
| SAV2401, nasD, nasE, nasF                            |
| SAV2402                                              |
| SAV2403                                              |
| SAV2405, SAV2404                                     |
| SAV2406                                              |
| SAV2408, SAV2407                                     |
| SAV2410, SAV2409                                     |
| fmhA                                                 |
| SAV2414, SAV2413, SAV2412                            |
| SAV2415                                              |
| SAV2416                                              |
| SAV2417                                              |
| sbi                                                  |
| hlgA                                                 |
| hlgC, hlgB                                           |
| bioD, bioA, bioB, SAV2424, SAV2423, SAV2422          |
| SAV2429, SAV2428                                     |
| SAV2430                                              |

Predicted operons from *S.aureus* strain Mu50 genome. These operons were predicted using the integrated consensus method as described in the paper with gene pair score 0 as the threshold for operon boundaries.

|                                                                                          |
|------------------------------------------------------------------------------------------|
| SAV2431                                                                                  |
| SAV2432, SAV2433                                                                         |
| SAV2434                                                                                  |
| SAV2435                                                                                  |
| SAV2436                                                                                  |
| SAV2437                                                                                  |
| SAV2438                                                                                  |
| SAV2439                                                                                  |
| SAV2440                                                                                  |
| SAV2441                                                                                  |
| SAV2442                                                                                  |
| SAV2443                                                                                  |
| SAV2444                                                                                  |
| opuCA, opuCB, opuCC, opuCD                                                               |
| SAV2449                                                                                  |
| SAV2450                                                                                  |
| SAV2451                                                                                  |
| SAV2452                                                                                  |
| SAV2454, SAV2453                                                                         |
| SAV2455                                                                                  |
| SAV2457, SAV2456                                                                         |
| SAV2458                                                                                  |
| SAV2459                                                                                  |
| SAV2460                                                                                  |
| SAV2470, SAV2469, SAV2468, SAV2467, SAV2466, SAV2465, SAV2464, SAV2463, SAV2462, SAV2461 |
| SAV2472, SAV2471                                                                         |
| SAV2473                                                                                  |
| SAV2474                                                                                  |
| SAV2476, SAV2475                                                                         |
| SAV2477                                                                                  |
| SAV2478                                                                                  |
| SAV2479                                                                                  |
| SAV2480                                                                                  |
| SAV2481                                                                                  |
| SAV2485, SAV2484, SAV2483, SAV2482                                                       |
| SAV2486                                                                                  |
| SAV2487                                                                                  |
| SAV2490, SAV2489, SAV2488                                                                |
| SAV2491                                                                                  |
| SAV2492                                                                                  |
| SAV2493                                                                                  |
| SAV2495, SAV2494                                                                         |
| SAV2496                                                                                  |
| SAV2497                                                                                  |
| sarH3                                                                                    |
| sarH2                                                                                    |
| gtaB                                                                                     |
| tnp                                                                                      |
| fnbB                                                                                     |
| fnb                                                                                      |
| SAV2504                                                                                  |
| gntR, gntK, gntP                                                                         |
| SAV2508                                                                                  |
| SAV2509                                                                                  |
| SAV2511, SAV2510                                                                         |
| SAV2512                                                                                  |
| SAV2513                                                                                  |
| SAV2514, SAV2515                                                                         |

Predicted operons from *S.aureus* strain Mu50 genome. These operons were predicted using the integrated consensus method as described in the paper with gene pair score 0 as the threshold for operon boundaries.

|                                       |
|---------------------------------------|
| fbp                                   |
| SAV2517                               |
| SAV2520, SAV2519, SAV2518             |
| SAV2521                               |
| SAV2522                               |
| SAV2523                               |
| ddh                                   |
| SAV2525                               |
| SAV2526, SAV2527                      |
| srtA                                  |
| SAV2529                               |
| SAV2532, SAV2531, SAV2530             |
| SAV2533                               |
| SAV2534                               |
| SAV2535                               |
| SAV2537, SAV2536                      |
| ptsG                                  |
| SAV2541, SAV2540, SAV2539             |
| SAV2542                               |
| SAV2543                               |
| SAV2544                               |
| mvaA                                  |
| mvaS                                  |
| adaB                                  |
| clpL                                  |
| SAV2551, feoB, SAV2549                |
| SAV2552                               |
| SAV2553                               |
| rocA                                  |
| SAV2555                               |
| SAV2556                               |
| copA                                  |
| SAV2558                               |
| SAV2560, SAV2559                      |
| SAV2565, SAV2564, SAV2563, crtM, crtN |
| SAV2566                               |
| SAV2567                               |
| SAV2568                               |
| isaA                                  |
| SAV2570                               |
| SAV2571                               |
| SAV2572                               |
| SAV2573                               |
| SAV2577, SAV2576, SAV2575, SAV2574    |
| SAV2578, SAV2579, SAV2580, SAV2581    |
| SAV2584, SAV2583, SAV2582             |
| SAV2587, SAV2586, SAV2585             |
| SAV2588                               |
| SAV2589                               |
| SAV2590                               |
| SAV2591                               |
| SAV2592                               |
| SAV2593                               |
| SAV2594                               |
| SAV2596, SAV2595                      |
| panB, panC, panD                      |
| SAV2600                               |
| SAV2601                               |

Predicted operons from *S.aureus* strain Mu50 genome. These operons were predicted using the integrated consensus method as described in the paper with gene pair score 0 as the threshold for operon boundaries.

|                                                                  |
|------------------------------------------------------------------|
| SAV2602                                                          |
| SAV2603                                                          |
| SAV2604                                                          |
| SAV2605                                                          |
| SAV2606                                                          |
| mgo2                                                             |
| SAV2608                                                          |
| SAV2609                                                          |
| SAV2610                                                          |
| SAV2611                                                          |
| gbsA, betA                                                       |
| SAV2614                                                          |
| cutT                                                             |
| nrdD, SAV2616                                                    |
| SAV2618                                                          |
| SAV2620, SAV2619                                                 |
| SAV2621                                                          |
| SAV2623, SAV2622                                                 |
| SAV2626, SAV2625, SAV2624                                        |
| phoB                                                             |
| SAV2628                                                          |
| SAV2629                                                          |
| clfB                                                             |
| arcA, arcB, arcD, arcC, SAV2631                                  |
| SAV2636                                                          |
| aur                                                              |
| isaB                                                             |
| SAV2639                                                          |
| SAV2640, SAV2641, pmi                                            |
| SAV2643                                                          |
| SAV2644                                                          |
| SAV2645                                                          |
| SAV2646                                                          |
| SAV2653, SAV2652, SAV2651, SAV2650, SAV2649, SAV2648, SAV2647    |
| SAV2654                                                          |
| SAV2655                                                          |
| SAV2656, SAV2657                                                 |
| SAV2658                                                          |
| SAV2661, SAV2660, SAV2659                                        |
| SAV2664, SAV2663, SAV2662                                        |
| icaR                                                             |
| icaA, icaD, icaB, icaC                                           |
| SAV2670                                                          |
| lip                                                              |
| SAV2680, hisG, SAV2678, SAV2677, hisB, hisH, SAV2674, hisF, hisI |
| SAV2681                                                          |
| SAV2686, SAV2685, SAV2684, SAV2683, SAV2682                      |
| SAV2687                                                          |
| drp35                                                            |
| SAV2689                                                          |
| pcp                                                              |
| SAV2692, SAV2691                                                 |
| SAV2693                                                          |
| SAV2694, SAV2695                                                 |
| SAV2696                                                          |
| SAV2697                                                          |
| SAV2698                                                          |
| SAV2699                                                          |



Predicted operons from *S.aureus* strain Mu50 genome. These operons were predicted using the integrated consensus method as described in the paper with gene pair score 0 as the threshold for operon boundaries.

|                           |
|---------------------------|
| SAV2700                   |
| vraD, vraE, SAV2703       |
| cspB                      |
| SAV2705                   |
| SAV2707, SAV2706          |
| SAV2708                   |
| thdF, gidA, gidB, SAV2709 |
| rpmH, rnpA                |
